# Supplementary material for: Chemovirotherapy of Pancreatic Adenocarcinoma by Combining Oncolytic Vaccinia Virus GLV-1h68 with nab-Paclitaxel Plus Gemcitabine
Source: PubMed Central journal article supplement — Mol Ther Oncolytics. 2017 Apr 19;6:10–21. doi: 10.1016/j.omto.2017.04.001 (PMC5458765; doi:10.1016/j.omto.2017.04.001), 2017-04-19
Supplement: mmc1.pdf [file mmc1.pdf]

OMTO, Volume 6

## Supplemental Information

**Chemovirotherapy of Pancreatic Adenocarcinoma**

**by Combining Oncolytic Vaccinia Virus**

**GLV-1h68 with *nab*-Paclitaxel Plus Gemcitabine**

**Eike Binz, Susanne Berchtold, Julia Beil, Martina Schell, Christine Geisler, Irina Smirnow, and Ulrich M. Lauer**

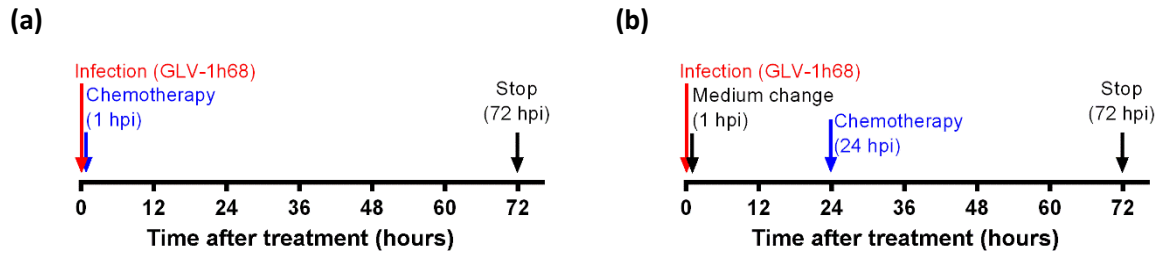

**Figure S1: Schedules of the chemovirotherapeutic combination settings of GLV-1h68 with either nab-paclitaxel or gemcitabine.** Tumor cells were infected with GLV-1h68 followed by a medium change at 1 hpi. **(a)** Setting of chemotherapy initiated “early” at 1 hpi. **(b)** Setting of chemotherapy started “late” at 24 hpi. Accordingly, change of the culture medium and addition of the respective chemotherapeutic compound (nab-paclitaxel or gemcitabine) was performed either “early” (at 1 hpi) or “late” (at 24 hpi). Remaining tumor cell masses were analyzed at 72 hpi by Sulforhodamine B (SRB) assays. hpi: hour(s) post infection.
